# Supplementary material
Source: MDPI journal article supplement (https://www.mdpi.com/2072-4292/12/19/3256)
Supplement: s1 [file s1]

## Supplementary Materials

**Table S1.** Characteristics of studied grasslands and observations.

| Grassland Plot | Altitude (m a. s. l.) | Number of Plant Species | Total Yield in 2018 (kg DM ha <sup>-1</sup> ) | First Cut  | Last Observation |
|----------------|-----------------------|-------------------------|-----------------------------------------------|------------|------------------|
| MT1            | 527                   | 13                      | 12670                                         | 11th April | 13th September   |
| MT2            | 526                   | 13                      | 13860                                         |            |                  |
| MT3*           | 527                   | 18                      | 17140                                         |            |                  |
| MB1            | 737                   | 17                      | 14410                                         | 16th April | 9th October      |
| MB2            | 731                   | 16                      | 13810                                         |            |                  |
| MB3*           | 744                   | 16                      | 15510                                         |            |                  |
| SB1            | 965                   | 20                      | 13720                                         | 16th April | 9th October      |
| SB2*           | 963                   | 21                      | 13640                                         |            |                  |
| SB3            | 923                   | 23                      | 15320                                         |            |                  |
| SI1            | 819                   | 18                      | 12360                                         | 23rd April | 10th October     |
| SI2            | 838                   | 17                      | 14660                                         |            |                  |
| SI3*           | 846                   | 16                      | 15670                                         |            |                  |
| BB1            | 552                   | 24                      | 9730                                          | 17th April | 17th October     |
| BB2            | 548                   | 27                      | 13590                                         |            |                  |
| BB3*           | 548                   | 27                      | 10300                                         |            |                  |
| BL1            | 520                   | 22                      | 13330                                         | 13th April | 2nd October      |
| BL2            | 526                   | 22                      | 13290                                         |            |                  |
| BL3*           | 533                   | 22                      | 10240                                         |            |                  |

MT, MB, SB, SI, BB, and BL identify the six commercial farms; the highlighted grassland plots (\*) were selected for wet-chemical analysis

**Table S2.** Characteristics of the calibration model of the laboratory NIRS (Fourier-Transform NIR, N-500, Büchi, Flawil, Switzerland; all herbage parameters as g kg<sup>-1</sup> DM).

| Laboratory NIRS              | CP   | CF   | ADF   | NDF   | CA*   |
|------------------------------|------|------|-------|-------|-------|
| V-Set bias                   | 0.08 | 0.10 | 0.85  | -0.93 | -0.39 |
| SEC                          | 5.42 | 8.02 | 10.66 | 15.07 | 6.22  |
| SEP                          | 5.36 | 8.03 | 10.27 | 15.15 | 6.24  |
| C-Set regression coefficient | 0.99 | 0.99 | 0.98  | 0.99  | 0.92  |
| V-Set regression coefficient | 0.99 | 0.99 | 0.99  | 0.99  | 0.91  |
| C-Set regression slope       | 0.99 | 0.97 | 0.97  | 0.98  | 0.84  |
| V-Set regression slope       | 0.98 | 0.97 | 0.96  | 0.98  | 0.85  |
| RPD                          | 52.6 | 45.8 | 38.9  | 40.0  | 20.0  |

V-Set: validation set; C-Set: calibration set; SEC: standard error of calibration; SEP: standard error of prediction; RPD (ratio of performance deviation) = calibration range/SEP; DM: dry matter as g kg<sup>-1</sup> original matter; CP: crude protein; CF: crude fiber; ADF: acid detergent fiber; NDF: neutral detergent fiber; CA: crude ash; \* Reference method was the incineration of herbage samples to constant weight at 550 °C for three hours (ISO 5984:2002). Agreement with the validation method is shown in Figure S1

**Table S3.** Passing–Bablok regression result from fitting the full data set or fitting 5 of 6 farms (left-out farm indicated).

| Linear Model                                             | Left-out Farm | Intercept | Slope |
|----------------------------------------------------------|---------------|-----------|-------|
| On-site NIRS DM ~ reference DM [g kg <sup>-1</sup> FM]   | none          | 107.6     | 0.45  |
|                                                          | MT            | 107.7     | 0.46  |
|                                                          | BL            | 104.9     | 0.46  |
|                                                          | SB            | 105.8     | 0.45  |
|                                                          | MB            | 107.3     | 0.45  |
|                                                          | BB            | 112.7     | 0.43  |
|                                                          | SI            | 104.8     | 0.46  |
| On-site NIRS CP ~ reference CP [g kg <sup>-1</sup> DM]   | none          | 109.8     | 0.24  |
|                                                          | MT            | 106.5     | 0.25  |
|                                                          | BL            | 110.3     | 0.23  |
|                                                          | SB            | 110.7     | 0.23  |
|                                                          | MB            | 113.2     | 0.22  |
|                                                          | BB            | 110.4     | 0.23  |
|                                                          | SI            | 106.6     | 0.25  |
| On-site NIRS CF ~ reference CF [g kg <sup>-1</sup> DM]   | none          | 132.8     | 0.43  |
|                                                          | MT            | 135.4     | 0.43  |
|                                                          | BL            | 134.1     | 0.43  |
|                                                          | SB            | 134.1     | 0.43  |
|                                                          | MB            | 130.6     | 0.44  |
|                                                          | BB            | 133.3     | 0.43  |
|                                                          | SI            | 131.1     | 0.44  |
| On-site NIRS NDF ~ reference NDF [g kg <sup>-1</sup> DM] | none          | 229.8     | 0.50  |
|                                                          | MT            | 246.7     | 0.47  |
|                                                          | BL            | 236.0     | 0.48  |
|                                                          | SB            | 213.3     | 0.52  |
|                                                          | MB            | 214.1     | 0.52  |
|                                                          | BB            | 232.8     | 0.48  |
|                                                          | SI            | 218.8     | 0.53  |
| On-site NIRS ADF ~ reference ADF [g kg <sup>-1</sup> DM] | none          | 168.4     | 0.38  |
|                                                          | MT            | 168.5     | 0.38  |
|                                                          | BL            | 168.8     | 0.38  |
|                                                          | SB            | 161.7     | 0.40  |
|                                                          | MB            | 170.3     | 0.37  |
|                                                          | BB            | 169.2     | 0.38  |
|                                                          | SI            | 169.1     | 0.38  |

DM: dry matter; FM: fresh matter; CP: crude protein; CF: crude fiber; NDF: neutral detergent fiber; ADF: acid detergent fiber; MT, MB, SB, SI, BB, and BL identify the six commercial farms

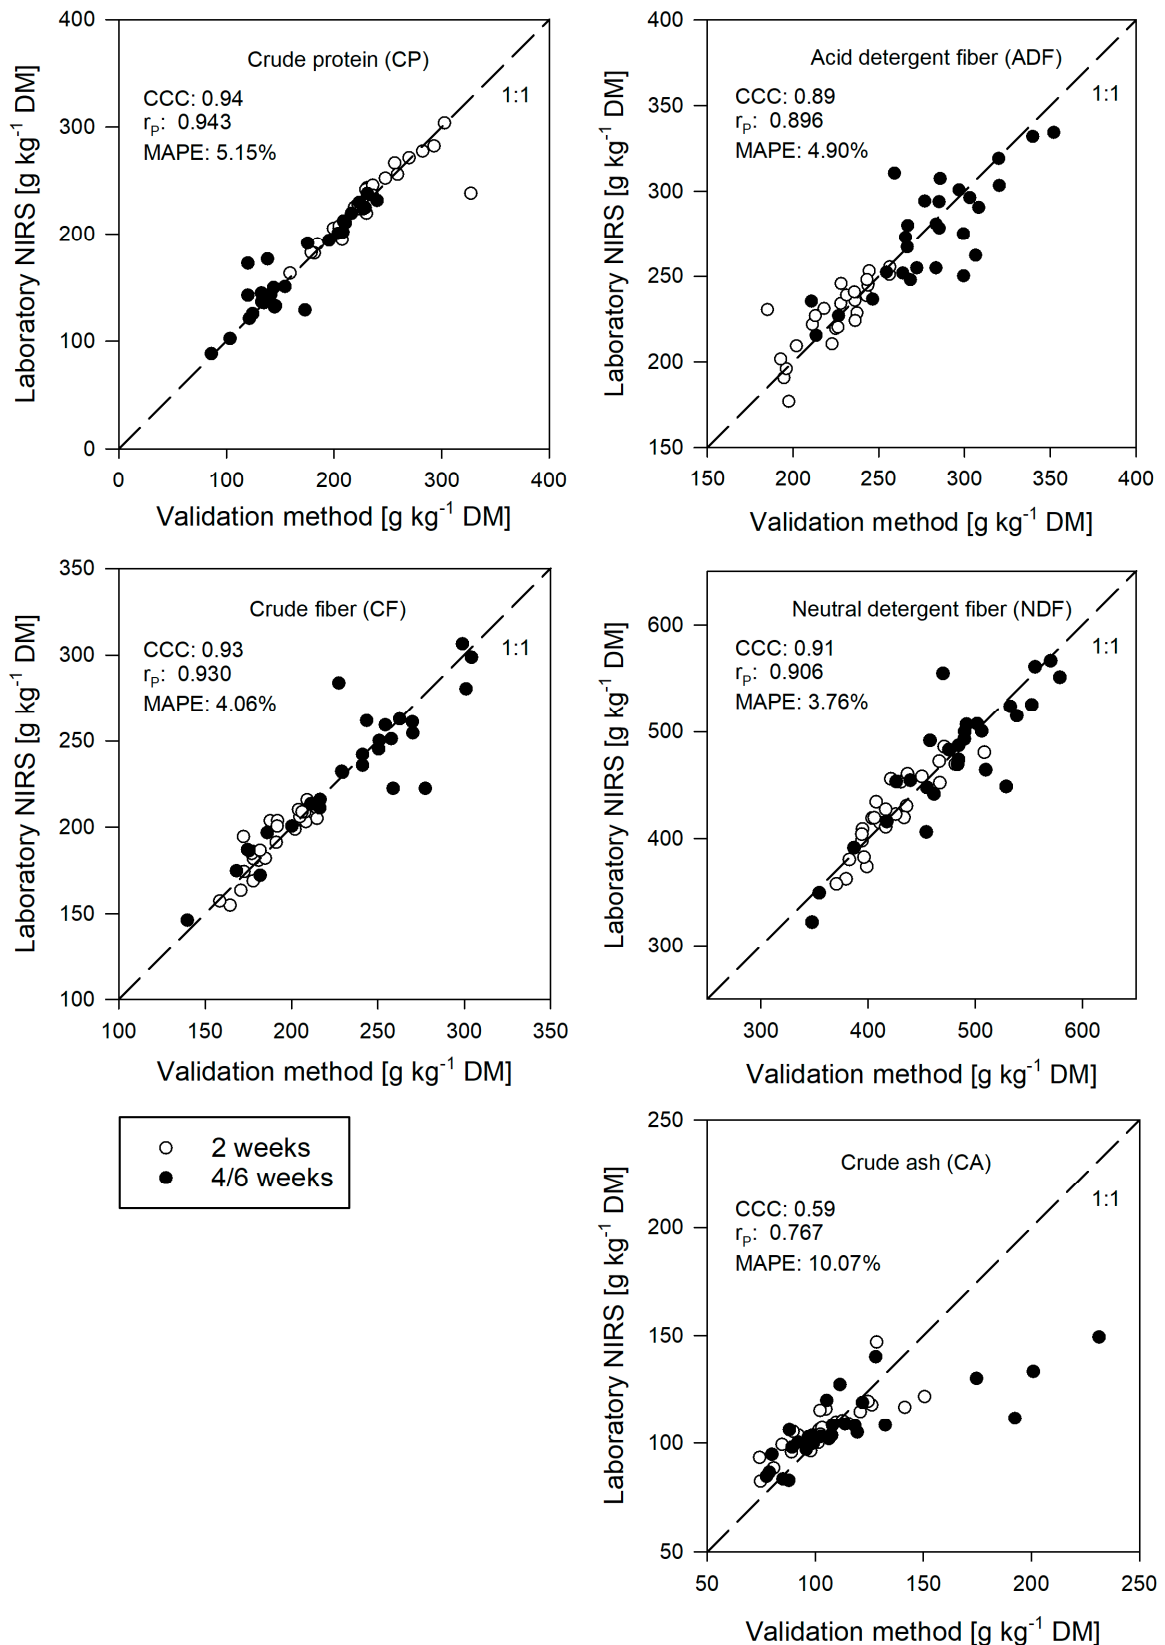

**Figure S1.** Laboratory NIRS measurements versus the validation methods ( $n = 54$ , Table 2) for quality parameters in dried herbage. Dashed line is the line of identity (1:1). The open and filled dots represent the two growth stages of the plants: “2 weeks” of growth and “4/6 weeks” of growth. The values of Pearson’s correlation coefficient ( $r_p$ ), Lin’s concordance correlation coefficient (CCC), and the mean absolute percentage error (MAPE) are given. CA was not further used to evaluate smart farming tools in the study, because sampling was prone to soil contamination. Data points far from the line of identity were confirmed to not explain measurement errors of other parameters.

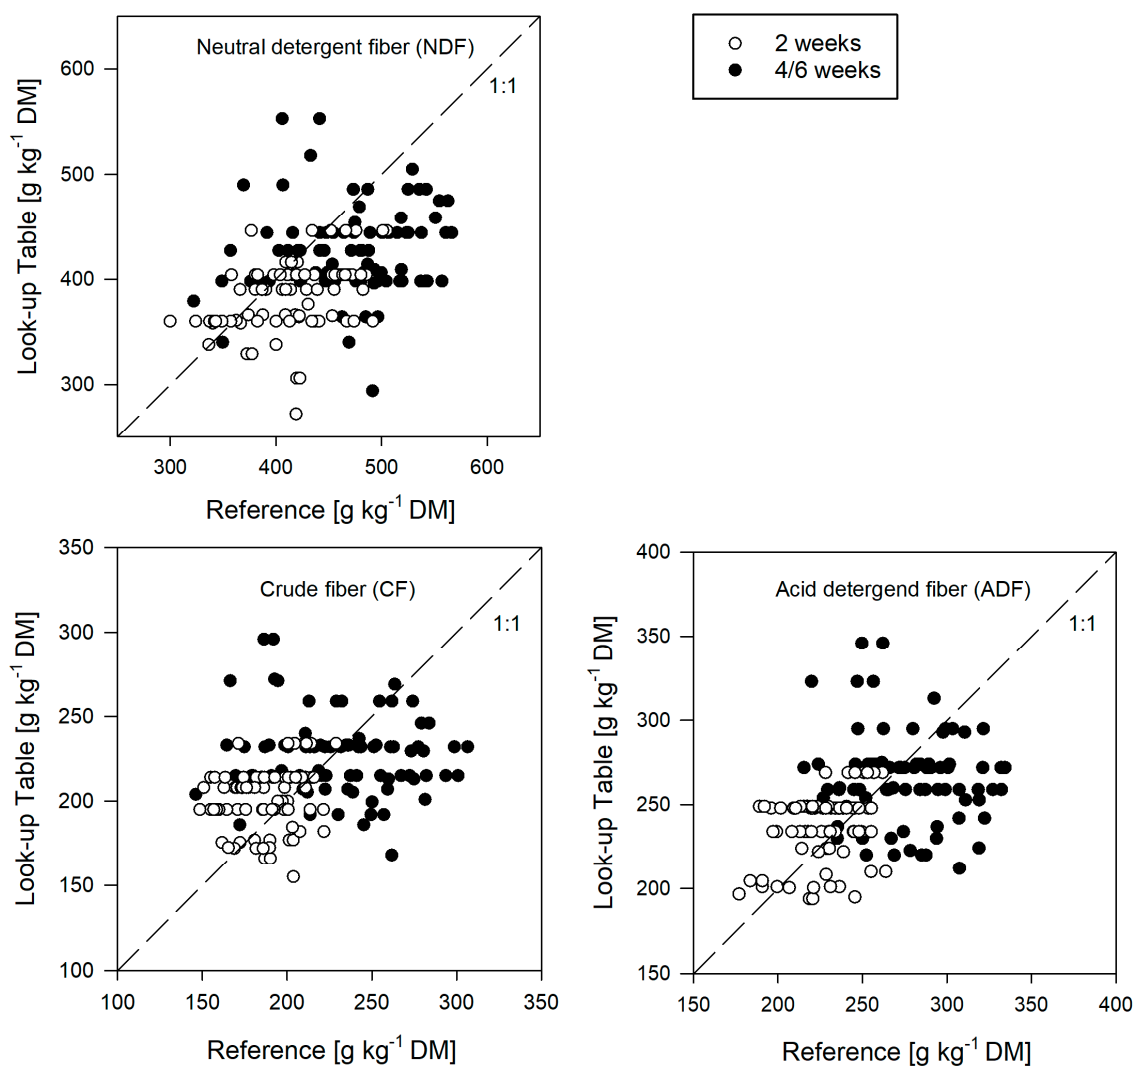

**Figure S2.** Herbage quality parameters determined with the Look-up Tables by Daccord et al. [10] versus the reference methods ( $n = 162$ ). The dashed line is the line of identity (1:1). The open and filled dots represent the two growth stages of the plants: “2 weeks” of growth and “4/6 weeks” of growth.

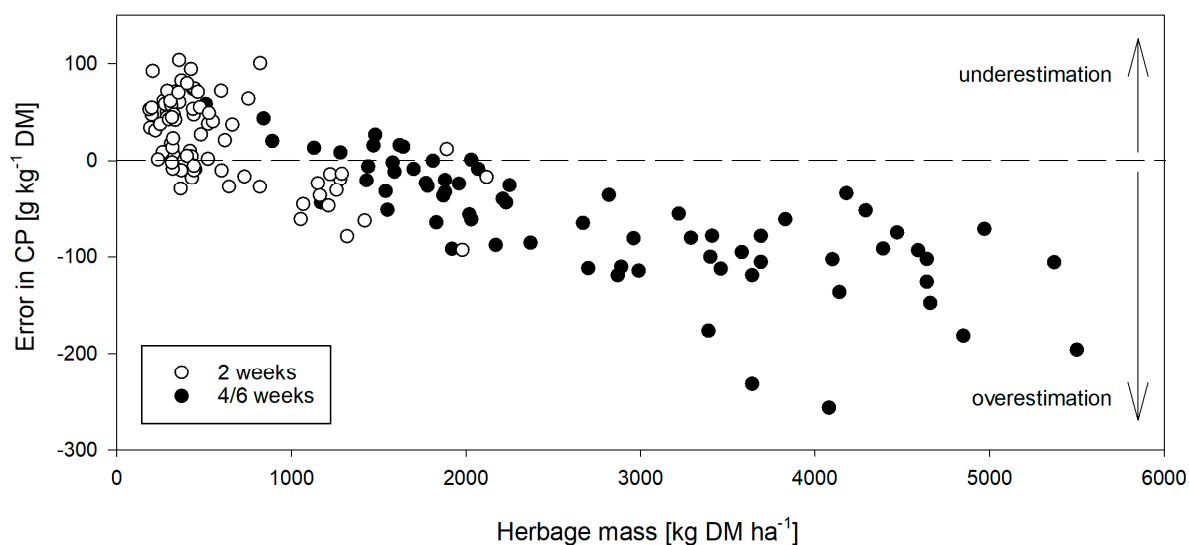

**Figure S3.** The error of the MSI-model (reference – MSI-model) in determining crude protein (CP) versus the herbage mass ( $n = 147$ ). The open and filled dots represent the two growth stages of the plants: “2 weeks” of growth and “4/6 weeks” of growth.

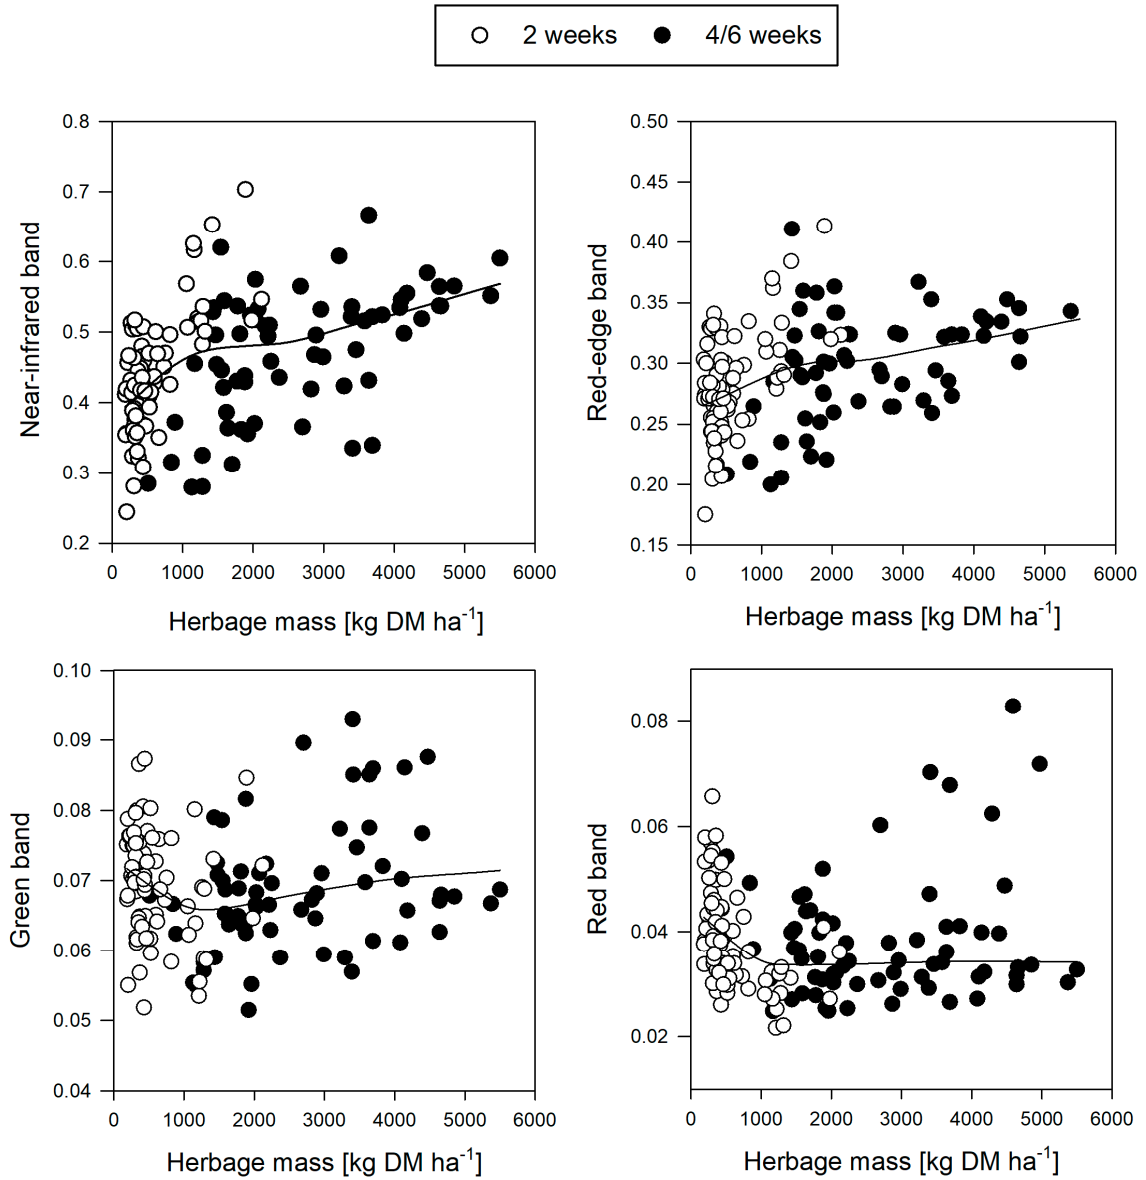

**Figure S4.** Reflectance in four spectral bands determined by UAV multispectral imagery versus the herbage mass ( $n = 147$ ). Values are plot-area means of the corresponding pixel values. Solid line is a smooth LOESS trend line. The open and filled dots represent the two growth stages of the plants: "2 weeks" of growth and "4/6 weeks" of growth. Nine and one far outlying data points are not shown for red-edge and red, respectively.

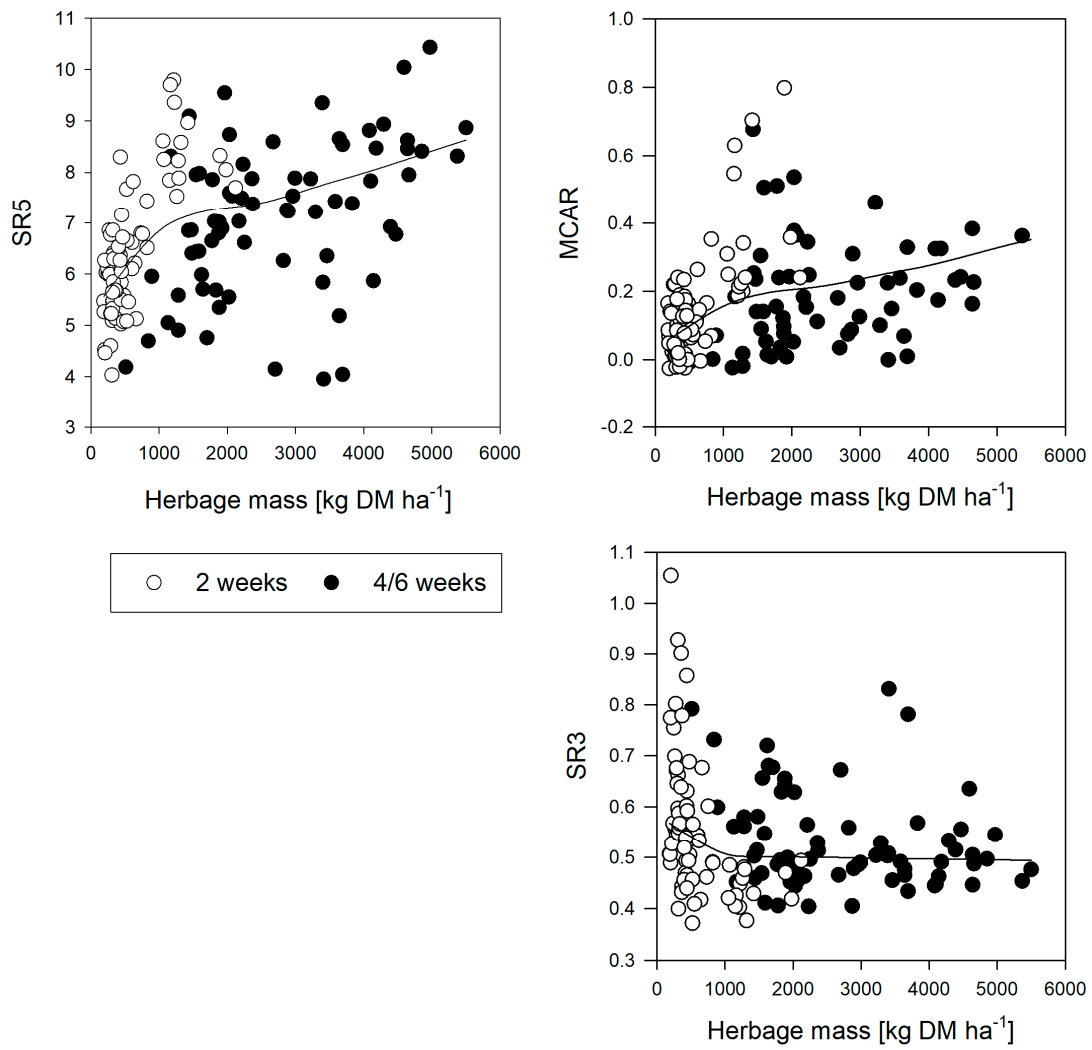

**Figure S5.** Vegetation indices determined by UAV multispectral imagery versus the herbage mass ( $n = 147$ ). Values are plot-area means of pixel-wise calculate indices. The solid line is a smooth LOESS trend line. The open and filled dots represent the two growth stages of the plants: "2 weeks" of growth and "4/6 weeks" of growth. The plot for MCAR does not show nine far outlying data points. Abbreviation of indices: SR5: Single Ratio 5, MCAR: Modified Chlorophyll Absorption Ratio, SR3: Single Ratio 3. Definition of indices according to Askari et al. [31].
